# Supplementary material
Source: publisher figshare collection journal article supplement (https://gsapubs.figshare.com/ndownloader/files/23304905)
Supplement: Supplementary file 1 [file 23304905]

## Sheet: Table DR1-Sample Locations
McKay, M.P., Bollen, E.M., Gray, K.D., Stowell, H.H., and Schwartz, J.J., 2017, Prolonged metamorphism during long-lived terrane accretion: Sm-Nd garnet and U-Pb zircon geochronology and pressure-temperature paths from the Salmon River suture zone, west-central Idaho, USA: doi: 10.1130/L642.1.
GSA Data Repository Item 2017234
		Table DR1-Sample Localities
		Sample	Zone	Easting	Northing	Unit (if known)	Lithology
		ID03	11T	545410	5003487
		ID07	11T	558557	5029042
		ID26	11T	551980	5028503
		ID42	11T	545638	5003564
		ID48	11T	563038	5028258
		ID04	11T	569141	5027897
		ID23	11T	546401	5008963
		ID58	11T	548550	5015800			approximate location on Whitebird Ridge Rd.
		PRC01	11T	575960	5030665
			*Using WGS 84 datum

## Sheet: Table 2-Whole rock compositions
		TABLE DR2-Whole Rock Compositions
			ID07	ID48	ID03	ID23	ID26
		SiO2	49.07	50.8616	51.3284	62.33	56.8098
		Al2O3	19.73	19.7752	19.44	16.55	18.1762
		TiO2	0.96	0.9594	0.6552	0.38	0.8522
		FeOt	10.76	11.5665	11.7834	9.44	8.605
		MgO	5.57	9.4982	6.5446	6	3.8324
		CaO	10.89	2.309	6.8502	1.21	6.3846
		MnO	0.2	0.2416	0.355	0.64	0.101
		Na2O	2.97	1.8973	1.5474	1.25	4.1162
		K2O	0.18	3.2432	2.3826	3.18	0.4428
		P2O5	0.21	0.1404	0.0612	0.03	0.1518
		Total	100.54	100.53	100.5	101.01	99.472

## Sheet: Table DR3a-Mineral compositions
		TABLE DR3A-Mineral Compositions in wt % oxide
			ID03								ID07			ID48
		Oxide	Amphibole		Biotite		Garnet		Feldspar		Amphibole	Garnet	Feldspar	Amphibole	Biotite		Garnet		Feldspar
		Location of analyses	matrix	garnet inclusion	matrix	garnet inclusion	rim	core	matrix	garnet inclusion	matrix	rim	matrix	matrix	matrix	garnet inclusion	rim	core	matrix	garnet inclusion
		Number of points averaged	2	2	3	2	8	5	3	2	3	5	3	3	4	2	5	5	3	2
		SiO2	42.86	44.02	38.31	37.01	38.67	38.9	49.72	47.85	41.55	37.48	56.91	42.33	37.14	38.35	39.09	39.43	60.35	58.43
		Al2O3	15.71	16.67	20.93	20.99	22.25	22.27	31.51	32.77	16.62	22.02	25.13	17.77	19.94	19.48	21.91	21.74	24.18	24.08
		TiO	0.46	0.15	2.15	0.42	0	0.01	0	0	0.49	0.07	0	0.47	1.15	0.01	0	0	0	0.01
		FeOt	15.28	13.03	13.99	11.47	28.51	27.82	0.09	0.15	15.07	26.38	0.44	13.07	12.09	9.55	27.12	27.22	0.03	0.09
		MgO	10.13	11.25	14.71	20.44	6.17	5.33	0	0	8.88	2.91	0	11.13	16.37	16.24	8.03	6.43	0	0
		CaO	10.9	11.08	0.01	0.1	3.86	4.12	13.88	15.98	11.2	8.34	6.17	9.83	0.08	0.49	3.05	3.61	5.64	5.71
		MnO	0.27	0.2	0.04	0.01	2.18	3.9	0	0	0.22	3.41	0.03	0.16	0.06	0.01	1.67	3.17	0.01	0.02
		Na2O	0.26	1.46	0.26	0.3	0	0	3.9	2.54	1.69	0	8.94	1.88	0.56	0.57	0	0	8.44	8.38
		K2O	0.35	0.29	8.4	8.29	0	0	0.03	0	0.16	0	0.05	0.1	8.04	6.37	0	0	0.05	0.03
		Total	96.22	98.15	98.8	99.03	101.64	102.35	99.13	99.29	95.88	100.61	97.67	96.74	95.43	91.07	100.87	101.6	98.7	96.75

## Sheet: Table DR3b-Thermobarometry
	TABLE DR3B-AvePT and Thermobarometry
		Thermobarometry Results								AvePT Results
		GASP				GBHP
		P (kbar)	error (kbar)	T (°C)	error (°C)	P (kbar)	error (kbar)	T (°C)	error (°C)	P (kbar)	T (°C)	sd	sigfit
	ID03	n/a	n/a	n/a	n/a	6.9	+/-1	680	+/- 50	7.1	680	3.21	2.8
	ID48	10.4	+/-1	723.9	+/- 50	10.4	+/-1	724	+/- 50
	ID07									8	650	2.68	3.04

## Sheet: Table DR4-Sm-Nd garnet ages
		TABLE DR4-Garnet Isotopic Composition
		Sample	Aliquot	Sm [ppm]	Nd [ppm]	147Sm/144Nd	2s	143Nd/144Nd	2s
		ID03	03WR	1.701	4.532	0.227	0.0016	0.513049	1.5e-05
			03MTX3	1.639	5.492	0.2293	0.0016	0.513038	1.5e-05
			03MTX6	1.388	3.659	0.2253	0.0016	0.513059	1.5e-05
			03-grt 3	0.619	0.189	1.9844	0.0139	0.51467	1.7e-05
			03-grt 7	0.712	0.258	1.6709	0.0116	0.514354	1.5e-05
			03-grt 6a	0.515	0.179	1.9437	0.0153	0.515579	4.8e-05
			03-grt 6b	0.622	0.191	1.9727	0.0141	0.514604	1.5e-05
		ID23	23WR	0.298	0.616	0.2923	0.0022	0.513079	2.1e-05
			23MTX	1.068	3.126	0.2065	0.0015	0.513029	1.5e-05
			23-grt B	1.294	0.493	1.5888	0.0117	0.514118	5e-05
			23-grt C-rim	0.93	0.164	3.4283	0.0249	0.515636	1.6e-05
			23-grt-core	1.19	0.26	2.7733	0.0204	0.515271	2.9e-05
		ID07	07-grt A	0.335	0.875	0.2313	0.0016	0.513041	1.4e-05
			07-grt B	0.181	0.451	0.2425	0.0016	0.51307	1.9e-05
			07-grt 2	0.202	0.481	0.2542	0.0018	0.513061	1.5e-05
			07-grt D	0.941	3.055	0.1863	0.0011	0.513017	1.4e-05
			07-hbl	2.28	7.217	0.1908	0.0012	0.513008	1.4e-05
			07WR	1.63	5.181	0.1902	0.0013	0.513013	1.5e-05
			07MTX	2.062	6.438	0.1936	0.0013	0.51301	1.4e-05
		ID48	48-grt A	1.236	0.354	2.1128	0.0149	0.514447	1.5e-05
			48-grt B	1.36	0.979	0.8401	0.0056	0.513445	2.8e-05
			48-grt C	1.327	0.755	1.0626	0.0075	0.513674	1.5e-05
			48-grt D	1.556	2.23	0.422	0.0025	0.513214	1.4e-05
			48WR	1.314	3.949	0.2011	0.0014	0.513032	1.5e-05
			48HBL	1.36	3.37	0.244	0.0017	0.513074	1.4e-05
			48MTX	1.25	4.511	0.1676	0.0012	0.513014	1.5e-05
		ID26	WR	4.409	15.89	0.1677	0.0012	0.512861	8e-06
			Mtx	3.031	12.151	0.1508	0.0011	0.512833	8e-06
			Grt bulk 1	2.012	2.441	0.4982	0.0035	0.513119	8e-06
			Grt bulk 2	2.013	2.29	0.5315	0.0037	0.51316	9e-06
			Grt bulk 4	1.648	2.116	0.4709	0.0034	0.513102	8e-06
			Grt bulk 5	1.65	2.419	0.4126	0.0029	0.513044	1.1e-05
			Grt bulk 6	2.01	4.268	0.2847	0.0021	0.512956	8e-06
			Grt bulk 9	2.379	3.063	0.4695	0.0033	0.513097	8e-06
			Grt bulk 11	2.192	2.426	0.5464	0.0038	0.513161	1e-05

## Sheet: Table DR5-Partial Dissolution
				TABLE DR5-Garnet Partial Dissolution
				Sample	Aliquot	HF leach	Perchloric leach	Pre-leach weight (g)	Post-leach mass (g)	% loss	147Sm/144Nd
				ID03	03-grt 3	97 min	180 min	0.0923	0.07853	14.92	1.9844
					03-grt 7	107 min	180 min	0.128	0.08779	31.41	1.6709
					03-grt 6a	102 min	180 min	0.08925	0.06179	30.77	1.9437
					03-grt 6b	87 min	180 min	0.0945	0.07192	23.89	1.9727
				ID23	23-grt B	105 min	180 min	0.1157	0.08121	29.81	1.5888
					23-grt C-rim	111 min	180 min	0.1305	0.08349	36.02	3.4283
					23-grt-core	75 min	180 min	0.0855	0.05847	31.61	2.7733
				ID07	07-grt A	80 min	180 min	0.0519	0.03401	34.47	0.2313
					07-grt B	100 min	180 min	0.08159	0.0436	46.56	0.2425
					07-grt 2	90 min	180 min	0.07924	0.04487	43.37	0.2542
					07-grt D	-	180 min	0.10654	0.09737	8.61	0.1863
				ID48	48-grt A	100 min	180 min	0.07541	0.02994	60.3	2.1128
					48-grt B	80 min	180 min	0.05375	0.03235	39.81	0.8401
					48-grt C	60 min	180 min	0.05203	0.03358	35.46	1.0626
					48-grt D	-	180 min	0.107	0.10099	5.62	0.422
				ID26	Grt bulk 1	40 min	90 min	0.24571	0.23094	6.01115	0.4982
					Grt bulk 2	40 min	90 min	0.23026	0.21144	8.17337	0.5315
					Grt bulk 4	15 min	90 min	0.33906	0.3116	8.09886	0.4709
					Grt bulk 5	15 min	90 min	0.35948	0.35466	1.34083	0.4126
					Grt bulk 6	0 min	90 min	0.38688	0.35034	9.44479	0.2847
					Grt bulk 9	60 min	90 min	n/a	0.05683	n/a	0.4695
					Grt bulk 11	30 min	90 min	n/a	0.05234	n/a	0.5464

## Sheet: PlotDat5
Source sheet	Table 6-ID42	0.241258	0.0343433	100		200		300		400		500		600		0	0	0	0	0.103498	0.0156334	0	0.00787373	0.264309	0.0347094	0.228767	0.0331479	0.27108	0.0309674	0.242721	0.0326373	0.124251	0.0183618	0.167978	0.0227212	0.15338	0.0221001	0.16076	0.022493	0.150482	0.0227085	0.1581	0.0232513	0.167834	0.0238416	0.178482	0.0244796	0.177457	0.0260879
Plot name	Concordia5	0.220446	0.0327779	0.103679	0.0156334	0.218107	0.0315113	0.344398	0.0476374	0.483784	0.0640155	0.637621	0.0806498	0.807407	0.097544	0.0210847	0.00329196	0.0210847	0.00328625	0.217708	0.0315113	0.863015	0.1	0.263863	0.0349037	0.228602	0.0332509	0.27038	0.0312757	0.242231	0.0328924	0.124089	0.0184693	0.167569	0.0229449	0.153189	0.0221552	0.160549	0.0225956	0.150298	0.0228022	0.15797	0.0232913	0.167648	0.0239411	0.178236	0.0246036	0.177085	0.0260961
Plot Type	1	0.234929	0.0302826	0.103675	0.0156375	0.218099	0.0315195	0.344386	0.0476498	0.483765	0.0640324	0.637595	0.0806712	0.807373	0.0975701	0.042614	0.00659476	0.042614	0.00658331	0.343738	0.0476374			0.262548	0.0350765	0.228124	0.0333358	0.268317	0.0315459	0.240792	0.0331144	0.123623	0.0185558	0.166406	0.0230885	0.152645	0.0221609	0.159948	0.022652	0.149777	0.0228526	0.1576	0.0232974	0.167122	0.0240021	0.177538	0.0246766	0.176001	0.0259984
1st free col	229	0.217547	0.0320332	0.103665	0.0156413	0.218076	0.0315273	0.344348	0.0476618	0.48371	0.0640486	0.637518	0.0806918	0.807272	0.0975952	0.0645972	0.00990842	0.0645972	0.00989119	0.482812	0.0640155			0.260415	0.035221	0.227351	0.0333992	0.264971	0.0317675	0.23846	0.0332948	0.122869	0.0186179	0.164535	0.0231465	0.151767	0.0221172	0.158982	0.0226601	0.148941	0.0228578	0.157005	0.0232695	0.166276	0.0240221	0.176414	0.0246959	0.174246	0.0257986
Sigma Level	2	0.116153	0.0179224	0.103648	0.0156449	0.218039	0.0315346	0.344287	0.0476728	0.48362	0.0640636	0.637395	0.0807108	0.807107	0.0976184	0.0870439	0.013233	0.0870439	0.01321	0.636279	0.0806498			0.257546	0.0353319	0.226312	0.0334387	0.26047	0.031932	0.235325	0.0334268	0.121857	0.0186533	0.162026	0.0231167	0.15059	0.0220256	0.157686	0.0226195	0.147822	0.0228176	0.156207	0.0232085	0.165142	0.0240004	0.174908	0.0246607	0.171888	0.0255044
Absolute Errs	FALSE	0.147955	0.0208613	0.103626	0.015648	0.21799	0.0315409	0.344205	0.0476825	0.483499	0.0640767	0.637228	0.0807274	0.806887	0.0976386	0.109964	0.0165685	0.109964	0.0165396	0.805631	0.097544			0.254051	0.0354047	0.225048	0.0334529	0.254988	0.0320332	0.231506	0.0335052	0.120626	0.0186606	0.158976	0.0230003	0.14916	0.0218897	0.156112	0.0225319	0.146461	0.0227336	0.155237	0.0231169	0.163763	0.0239379	0.173076	0.0245723	0.169018	0.0251271
Symbol Type	1	0.143983	0.0208726	0.103598	0.0156506	0.217929	0.0315461	0.344105	0.0476905	0.483352	0.0640874	0.637024	0.080741	0.806617	0.0976553	0.133367	0.019915	0.133367	0.0198802	IsoLine	IsoLine			0.250064	0.0354368	0.223607	0.0334411	0.248735	0.0320671	0.22715	0.0335271	0.119223	0.0186395	0.155503	0.0228016	0.14753	0.0217147	0.15432	0.0224007	0.144913	0.0226089	0.154132	0.0229982	0.162194	0.023837	0.170991	0.0244343	0.165746	0.0246811
Inverse Plot	FALSE	0.150428	0.0213948	0.103567	0.0156525	0.21786	0.03155	0.343991	0.0476964	0.483184	0.0640954	0.636793	0.0807512	0.80631	0.0976676	0.157264	0.0232725	0.157264	0.0232318					0.245739	0.0354268	0.222045	0.0334038	0.241951	0.0320324	0.222426	0.0334915	0.117702	0.0185909	0.15174	0.0225284	0.145764	0.0215074	0.152377	0.0222307	0.143235	0.0224484	0.152935	0.0228569	0.160493	0.0237014	0.168731	0.0242517	0.162197	0.0241837
Color Plot	TRUE	0.141561	0.0216763	0.103533	0.0156537	0.217785	0.0315524	0.343867	0.0477	0.483001	0.0641003	0.636541	0.0807574	0.805977	0.0976753	0.181664	0.0266411	0.181664	0.0265944					0.241242	0.0353752	0.220421	0.0333425	0.234898	0.0319305	0.217514	0.0333999	0.116121	0.0185165	0.147832	0.0221911	0.14393	0.0212757	0.15036	0.0220286	0.141494	0.0222582	0.151691	0.0226984	0.158727	0.0235365	0.166385	0.0240318	0.158508	0.0236538
3D plot	FALSE	0.151729	0.0224108	0.103498	0.0156541	0.217708	0.0315532	0.343738	0.0477012	0.482812	0.064102	0.636279	0.0807595	0.805631	0.0976778	0.20658	0.0300208	0.20658	0.0299681					0.236745	0.035284	0.218798	0.0332594	0.227846	0.0317652	0.212603	0.0332558	0.114542	0.0184194	0.143928	0.0218027	0.142098	0.0210285	0.148346	0.0218022	0.139754	0.0220456	0.150449	0.0225289	0.156963	0.0233486	0.164041	0.0237829	0.154821	0.023112
Linear	FALSE	0.158787	0.0229374	0.103463	0.0156537	0.21763	0.0315524	0.343609	0.0477	0.482622	0.0641003	0.636018	0.0807574	0.805284	0.0976753	0.23202	0.0334116	0.23202	0.0333528					0.232422	0.0351566	0.217239	0.0331579	0.221066	0.031543	0.207883	0.0330647	0.113025	0.0183031	0.140179	0.0213781	0.140338	0.0207753	0.146411	0.0215601	0.138085	0.0218189	0.149257	0.0223548	0.155269	0.0231449	0.16179	0.0235146	0.151277	0.022579
Data Range	G6:K107	0.16646	0.023278	0.103429	0.0156525	0.217555	0.03155	0.343485	0.0476964	0.48244	0.0640954	0.635766	0.0807512	0.804951	0.0976676	0.257997	0.0368135	0.257997	0.0367486					0.228438	0.0349979	0.215803	0.0330417	0.214818	0.0312723	0.203533	0.0328339	0.111628	0.0181722	0.136728	0.0209337	0.138718	0.0205258	0.144631	0.0213117	0.136549	0.0215866	0.148159	0.0221829	0.15371	0.0229332	0.159718	0.0232372	0.148013	0.0220753
Filled Symbols	TRUE	0.158553	0.0233413	0.103397	0.0156506	0.217486	0.0315461	0.34337	0.0476905	0.482271	0.0640874	0.635534	0.080741	0.804644	0.0976553	0.284521	0.0402267	0.284521	0.0401557					0.224947	0.0348141	0.214545	0.0329154	0.209344	0.0309636	0.199723	0.0325724	0.110405	0.0180318	0.13371	0.0204864	0.1373	0.0202897	0.143074	0.0210664	0.135205	0.0213578	0.147198	0.0220198	0.152347	0.0227217	0.157906	0.0229613	0.145154	0.0216202
ConcAge	FALSE	0.171261	0.0252389	0.10337	0.015648	0.217425	0.0315409	0.34327	0.0476825	0.482124	0.0640767	0.635331	0.0807274	0.804375	0.0976386	0.311605	0.043651	0.311605	0.0435739					0.222083	0.0346122	0.213514	0.0327839	0.204853	0.0306288	0.196597	0.0322902	0.109403	0.0178871	0.131238	0.0200536	0.13614	0.0200759	0.141799	0.0208338	0.134106	0.0211413	0.146412	0.0218717	0.151231	0.0225185	0.156422	0.0226976	0.14281	0.0212313
ConcSwap	FALSE	0.197426	0.0273204	0.103347	0.0156449	0.217376	0.0315346	0.343188	0.0476728	0.482003	0.0640636	0.635164	0.0807108	0.804154	0.0976184	0.33926	0.0470867	0.33926	0.0470033					0.219956	0.0344	0.212749	0.0326521	0.201517	0.0302806	0.194276	0.0319981	0.10866	0.0177437	0.129409	0.0196518	0.13528	0.0198928	0.140856	0.0206227	0.133293	0.0209453	0.145829	0.0217443	0.150405	0.0223313	0.155324	0.0224563	0.141071	0.0209234
1st Symbol-row	1	0.196035	0.0282545	0.103331	0.0156413	0.217339	0.0315273	0.343127	0.0476618	0.481913	0.0640486	0.63504	0.0806918	0.80399	0.0975952	0.367498	0.0505337	0.367498	0.050444					0.218647	0.0341855	0.21228	0.0325251	0.199466	0.0299325	0.19285	0.0317073	0.108205	0.0176073	0.128293	0.0192965	0.134755	0.0197474	0.14028	0.0204413	0.132798	0.0207774	0.145474	0.0216425	0.149902	0.0221675	0.154654	0.0222465	0.140004	0.0207085
		0.212348	0.0284793	0.10332	0.0156375	0.217316	0.0315195	0.34309	0.0476498	0.481858	0.0640324	0.634964	0.0806712	0.803889	0.0975701	0.396331	0.053992	0.396331	0.0538961					0.218208	0.0339772	0.212125	0.0324078	0.198778	0.0295978	0.192372	0.0314291	0.108056	0.0174829	0.127932	0.0190014	0.134585	0.0196452	0.140095	0.0202965	0.13264	0.0206441	0.145359	0.0215702	0.149739	0.0220332	0.154438	0.0220763	0.13965	0.0205948
		0.20464	0.0286342	0.103317	0.0156334	0.217308	0.0315113	0.343077	0.0476374	0.481839	0.0640155	0.634938	0.0806498	0.803855	0.097544	0.425772	0.0574617	0.425772	0.0573594					0.218654	0.0337829	0.21229	0.0323048	0.199478	0.0292895	0.192863	0.031174	0.108218	0.0173754	0.128341	0.0187777	0.134776	0.0195901	0.140307	0.020194	0.132824	0.0205504	0.145489	0.0215303	0.149925	0.0219337	0.154684	0.0219523	0.140022	0.0205866
		0.199786	0.0288152	0.10332	0.0156294	0.217316	0.0315031	0.34309	0.0476249	0.481858	0.0639987	0.634964	0.0806284	0.803889	0.0975179	0.455834	0.0609428	0.455834	0.0608342					0.219968	0.0336102	0.212768	0.0322199	0.201541	0.0290194	0.194301	0.030952	0.108684	0.017289	0.129504	0.0186341	0.135321	0.0195844	0.140907	0.0201376	0.133344	0.0205	0.145859	0.0215241	0.150451	0.0218728	0.155382	0.0218793	0.141106	0.0206843
		0.205746	0.029067	0.103331	0.0156255	0.217339	0.0314953	0.343127	0.0476129	0.481913	0.0639825	0.63504	0.0806078	0.80399	0.0974929	0.48653	0.0644354	0.48653	0.0643204					0.222101	0.0334656	0.213542	0.0321565	0.204888	0.0287977	0.196633	0.0307716	0.109438	0.0172269	0.131375	0.018576	0.136198	0.0196281	0.141874	0.0201295	0.134181	0.0204947	0.146454	0.0215521	0.151297	0.0218528	0.156506	0.02186	0.142861	0.0208841
		0.204848	0.0295978	0.103347	0.015622	0.217376	0.031488	0.343188	0.0476019	0.482003	0.0639675	0.635164	0.0805888	0.804154	0.0974697	0.517873	0.0679395	0.517873	0.067818					0.224971	0.0333547	0.21458	0.032117	0.209388	0.0286332	0.199769	0.0306396	0.11045	0.0171915	0.133884	0.0186058	0.137375	0.0197197	0.143169	0.02017	0.1353	0.0205349	0.147252	0.021613	0.152432	0.0218744	0.158012	0.0218952	0.145219	0.0211783
		0.210324	0.0298479	0.10337	0.0156189	0.217425	0.0314817	0.34327	0.0475922	0.482124	0.0639544	0.635331	0.0805722	0.804375	0.0974495	0.549877	0.0714551	0.549877	0.0713271					0.228466	0.0332819	0.215844	0.0321028	0.21487	0.028532	0.203588	0.0305612	0.111681	0.0171842	0.136934	0.0187223	0.138805	0.0198556	0.144743	0.0202576	0.13666	0.020619	0.148222	0.0217046	0.15381	0.0219369	0.159844	0.0219836	0.148089	0.0215556
		0.212309	0.0299812	0.103397	0.0156163	0.217486	0.0314764	0.34337	0.0475843	0.482271	0.0639437	0.635534	0.0805585	0.804644	0.0974328	0.582556	0.0749823	0.582556	0.0748478					0.232452	0.0332498	0.217285	0.0321146	0.221123	0.0284981	0.207943	0.0305393	0.113084	0.0172053	0.140407	0.0189209	0.140435	0.0200306	0.146536	0.0203889	0.138209	0.0207437	0.149327	0.0218234	0.15538	0.0220379	0.161929	0.0221217	0.151361	0.0220016
		0.2073	0.0304514	0.103429	0.0156144	0.217555	0.0314726	0.343485	0.0475784	0.48244	0.0639357	0.635766	0.0805484	0.804951	0.0974205	0.615923	0.0785211	0.615923	0.07838					0.236777	0.0332598	0.218847	0.0321519	0.227907	0.0285328	0.212668	0.0305749	0.114605	0.0172539	0.14417	0.0191942	0.142201	0.0202379	0.148478	0.0205589	0.139886	0.0209042	0.150524	0.0219647	0.15708	0.0221734	0.164189	0.0223042	0.15491	0.022499
		0.208652	0.0304874	0.103463	0.0156132	0.21763	0.0314702	0.343609	0.0475747	0.482622	0.0639307	0.636018	0.0805421	0.805284	0.0974128	0.649995	0.0820715	0.649995	0.0819238					0.241275	0.0333114	0.220471	0.0322133	0.23496	0.0286347	0.21758	0.0306665	0.116186	0.0173282	0.148079	0.0195315	0.144035	0.0204696	0.150495	0.0207609	0.141628	0.0210944	0.151767	0.0221231	0.158847	0.0223383	0.166535	0.0225241	0.158599	0.0230289
		0.209836	0.0306315	0.103498	0.0156128	0.217708	0.0314694	0.343738	0.0475735	0.482812	0.0639291	0.636279	0.08054	0.805631	0.0974103	0.684784	0.0856336	0.684784	0.0854793					0.245771	0.0334026	0.222094	0.0322963	0.242012	0.0288	0.22249	0.0308106	0.117765	0.0174254	0.151982	0.0199199	0.145868	0.0207168	0.15251	0.0209874	0.143367	0.021307	0.153009	0.0222926	0.16061	0.0225262	0.168879	0.022773	0.162286	0.0235707
		0.215035	0.0309059	0.103533	0.0156132	0.217785	0.0314702	0.343867	0.0475747	0.483001	0.0639307	0.636541	0.0805421	0.805977	0.0974128	0.720308	0.0892075	0.720308	0.0890464					0.250095	0.03353	0.223653	0.0323978	0.248792	0.0290222	0.227211	0.0310017	0.119282	0.0175416	0.155732	0.0203445	0.147628	0.02097	0.154444	0.0212295	0.145037	0.0215337	0.154202	0.0224667	0.162304	0.0227299	0.17113	0.0230414	0.165829	0.0241037
		0.21467	0.0309083	0.103567	0.0156144	0.21786	0.0314726	0.343991	0.0475784	0.483184	0.0639357	0.636793	0.0805484	0.80631	0.0974205	0.75658	0.0927931	0.75658	0.0926253					0.254078	0.0336887	0.22509	0.032514	0.25504	0.0292929	0.23156	0.0312325	0.120679	0.0176725	0.159182	0.0207889	0.149247	0.0212195	0.156224	0.0214779	0.146573	0.0217659	0.1553	0.0226386	0.163863	0.0229416	0.173202	0.0233188	0.169093	0.0246074
		0.218528	0.0310773	0.103598	0.0156163	0.217929	0.0314764	0.344105	0.0475843	0.483352	0.0639437	0.637024	0.0805585	0.806617	0.0974328	0.793617	0.0963906	0.793617	0.096216					0.257569	0.0338725	0.226347	0.0326403	0.260514	0.0296016	0.235371	0.031494	0.121902	0.017813	0.162201	0.0212361	0.150665	0.0214556	0.157782	0.0217232	0.147917	0.0219947	0.156261	0.0228017	0.165226	0.0231531	0.175014	0.0235946	0.171952	0.0250625
		0.217264	0.0313021	0.103626	0.0156189	0.21799	0.0314817	0.344205	0.0475922	0.483499	0.0639544	0.637228	0.0805722	0.806887	0.0974495	0.831435	0.0999998	0.831435	0.0998184					0.260434	0.0340744	0.227378	0.0327719	0.265005	0.0299365	0.238497	0.0317762	0.122904	0.0179577	0.164672	0.0216689	0.151826	0.0216693	0.159057	0.0219558	0.149016	0.0222113	0.157047	0.0229499	0.166342	0.0233564	0.176498	0.0238583	0.174296	0.0254514
		0.218954	0.0313134	0.103648	0.015622	0.218039	0.031488	0.344287	0.0476019	0.48362	0.0639675	0.637395	0.0805888	0.807107	0.0974697	0.831436	0.1	0.833375	0.1					0.262561	0.0342866	0.228143	0.0329037	0.268341	0.0302846	0.240818	0.0320683	0.123647	0.018101	0.166501	0.0220707	0.152685	0.0218525	0.16	0.0221669	0.149829	0.0224073	0.157629	0.0230773	0.167168	0.0235435	0.177596	0.0240997	0.176035	0.0257592
		0.224503	0.0320001	0.103665	0.0156255	0.218076	0.0314953	0.344348	0.0476129	0.48371	0.0639825	0.637518	0.0806078	0.807272	0.0974929	IsoLine	IsoLine	0.829539	0.1					0.263869	0.0345011	0.228612	0.0330306	0.270392	0.0306327	0.242244	0.0323591	0.124102	0.0182375	0.167617	0.022426	0.15321	0.0219979	0.160575	0.0223483	0.150324	0.0225752	0.157985	0.0231791	0.167672	0.0237074	0.178266	0.0243094	0.177103	0.0259742
		0.230495	0.0321064	0.103675	0.0156294	0.218099	0.0315031	0.344386	0.0476249	0.483765	0.0639987	0.637595	0.0806284	0.807373	0.0975179			0.793617	0.0965651					0.264309	0.0347094	0.228767	0.0331479	0.27108	0.0309674	0.242721	0.0326373	0.124251	0.0183618	0.167978	0.0227212	0.15338	0.0221001	0.16076	0.022493	0.150482	0.0227085	0.1581	0.0232513	0.167834	0.0238416	0.178482	0.0244796	0.177457	0.0260879
		0.223903	0.0322297	0.103679	0.0156334	0.218107	0.0315113	0.344398	0.0476374	0.483784	0.0640155	0.637621	0.0806498	0.807407	0.097544			0.75658	0.0929609					ErrEll	ErrEll	ErrEll	ErrEll	ErrEll	ErrEll	ErrEll	ErrEll	ErrEll	ErrEll	ErrEll	ErrEll	ErrEll	ErrEll	ErrEll	ErrEll	ErrEll	ErrEll	ErrEll	ErrEll	ErrEll	ErrEll	ErrEll	ErrEll	ErrEll	ErrEll
		0.232099	0.0324182	ConcTikEll	ConcTikEll	ConcTikEll	ConcTikEll	ConcTikEll	ConcTikEll	ConcTikEll	ConcTikEll	ConcTikEll	ConcTikEll	ConcTikEll	ConcTikEll			0.720308	0.0893686
		0.219866	0.0326942															0.684784	0.085788
		0.24963	0.0331127															0.649995	0.0822192
		0.21745	0.0332898															0.615923	0.0786621
		0.233035	0.0333718															0.582556	0.0751168
		0.227136	0.03352															0.549877	0.071583
		0.239875	0.0335647															0.517873	0.0680609
		0.231711	0.0336465															0.48653	0.0645504
		0.234923	0.0339041															0.455834	0.0610514
		0.23508	0.0339167															0.425772	0.0575639
		0.235153	0.0341684															0.396331	0.0540879
		0.238876	0.0342599															0.367498	0.0506233
		0.241176	0.0347664															0.33926	0.0471701
		0.242041	0.0350053															0.311605	0.0437282
		0.244677	0.035098															0.284521	0.0402977
		0.259517	0.0353873															0.257997	0.0368784
		0.265711	0.039716															0.23202	0.0334703
		0.495411	0.0615338															0.20658	0.0300735
		0.580002	0.0723428															0.181664	0.0266878
		0.144311	0.0218082															0.157264	0.0233133
		0.186286	0.0258116															0.133367	0.0199498
		0.206247	0.0295817															0.109964	0.0165974
		0.168975	0.0299733															0.0870439	0.0132561
		0.22082	0.030061															0.0645972	0.00992566
		0.195676	0.0310341															0.042614	0.0066062
		0.213597	0.0312547															0.0210847	0.00329767
		0.214538	0.0312644															0	0
		0.201067	0.0315135															0	0
		0.231501	0.0315314															ConcBand	ConcBand
		0.183839	0.0315966
		0.222564	0.0316003
		0.200699	0.0316027
		0.217983	0.0316895
		0.207848	0.0317009
		0.198085	0.0317423
		0.231488	0.0317871
		0.204288	0.0320163
		0.215431	0.032039
		0.201571	0.0321829
		0.216922	0.0322099
		0.282639	0.0322352
		0.198309	0.0323245
		0.212692	0.0323513
		0.229824	0.0324036
		0.240682	0.0325988
		0.225438	0.0326357
		0.24002	0.0326727
		0.229383	0.0327581
		0.196525	0.0328354
		0.230172	0.0328483
		0.264342	0.0329683
		0.227592	0.0330746
		0.256815	0.0330843
		0.239647	0.0332614
		0.260032	0.033423
		0.186616	0.0334522
		0.195099	0.0335968
		0.228818	0.0336759
		0.296401	0.033431
		0.308131	0.0322771
		0.327354	0.0316569
		0.249639	0.0336371
		0.315779	0.0313126
		0.196507	0.0326463
		0.239999	0.0314293
		0.197611	0.0329496
		0.195644	0.0316092
		0.187904	0.0328541
		IsoLine	IsoLine
[truncated: 180 more columns]

## Sheet: Table 6-ID42
Table DR6. U-Pb for sample ID42
							Isotope ratios						Apparent ages (Ma)
Analysis	U	206Pb	U/Th	206Pb*	±	207Pb*	±	206Pb*	±	error	206Pb*	±	207Pb*	±	206Pb*	±	Best age	±	Conc
	(ppm)	204Pb		207Pb*	(%)	235U*	(%)	238U	(%)	corr.	238U*	(Ma)	235U	(Ma)	207Pb*	(Ma)	(Ma)	(Ma)	(%)
10IDMM42GR11A	146.781	15349.1	5.39805	19.6273	7.35924	0.241258	7.80671	0.0343433	2.60505	0.333693	217.674	5.57586	219.45	15.4082	238.531	169.897	217.674	5.57586	NA
10IDMM42GR12A	470.591	47023.5	10.0836	20.5012	2.58452	0.220446	3.08405	0.0327779	1.68273	0.545625	207.911	3.44276	202.281	5.65639	137.178	60.7257	207.911	3.44276	NA
10IDMM42GR13A	121.033	12458.5	2.93935	17.7729	11.615	0.234929	12.5734	0.0302826	4.81486	0.38294	192.317	9.12303	214.26	24.2918	462.881	258.189	192.317	9.12303	NA
10IDMM42GR14A	192.405	24174.2	1.94935	20.3025	8.65293	0.217547	9.45519	0.0320332	3.81148	0.40311	203.261	7.62639	199.866	17.1557	159.995	202.725	203.261	7.62639	NA
10IDMM42-GR36D	110.41	2625.77	1244.99	21.2748	4.5932	0.116153	5.69639	0.0179224	3.36918	0.591459	114.512	3.82405	111.579	6.01926	49.457	109.713	114.512	3.82405	NA
10IDMM42-GR15J	77.7583	4314.36	437.991	19.4407	6.48667	0.147955	11.0577	0.0208613	8.95517	0.809861	133.097	11.7969	140.105	14.472	260.547	149.12	133.097	11.7969	NA
10IDMM42-GR36C	195.005	16500.9	19.6664	19.988	1.692	0.143983	5.333	0.0208726	5.05747	0.948335	133.169	6.66588	136.585	6.81551	196.414	39.3279	133.169	6.66588	NA
10IDMM42-GR15L	131.181	14369.9	-3990.56	19.6102	2.83714	0.150428	5.61253	0.0213948	4.84263	0.862826	136.465	6.53904	142.29	7.45186	240.565	65.4131	136.465	6.53904	NA
10IDMM42-GR15N	86.7253	2071.22	6208.21	21.1127	2.5625	0.141561	5.14945	0.0216763	4.46659	0.867392	138.241	6.10895	134.433	6.48397	67.6901	60.9927	138.241	6.10895	NA
10IDMM42-GR15H	247.065	9363.12	108.831	20.3652	1.13001	0.151729	3.43053	0.0224108	3.23907	0.944191	142.874	4.57689	143.438	4.58894	152.759	26.4479	142.874	4.57689	NA
10IDMM42-GR36A	126.951	7970.18	11.0374	19.9174	2.59719	0.158787	4.6556	0.0229374	3.86383	0.829933	146.194	5.58511	149.64	6.47771	204.631	60.281	146.194	5.58511	NA
10IDMM42-GR15F	120.097	6715.97	346.007	19.2813	3.16729	0.16646	5.90117	0.023278	4.97916	0.843759	148.339	7.30173	156.342	8.55102	279.429	72.4985	148.339	7.30173	NA
10IDMM42-GR37A	286.515	12324.5	22.991	20.2979	1.12451	0.158553	9.74163	0.0233413	9.67651	0.993315	148.739	14.228	149.436	13.5378	160.513	26.2923	148.739	14.228	NA
10IDMM42-GR15O	68.0764	1947.5	119.537	20.3195	4.33651	0.171261	8.07396	0.0252389	6.81054	0.843519	160.681	10.808	160.513	11.9879	158.026	101.536	160.681	10.808	NA
10IDMM42-GR30B	73.5507	6286.27	8.13262	19.0803	4.20165	0.197426	6.61111	0.0273204	5.1042	0.772065	173.756	8.75041	182.946	11.0682	303.334	95.7939	173.756	8.75041	NA
10IDMM42-GR34A	206.923	8802.25	5.06017	19.8726	1.35925	0.196035	14.4767	0.0282545	14.4128	0.995582	179.615	25.5303	181.766	24.0975	209.846	31.5199	179.615	25.5303	NA
10IDMM42-GR31C_CORE	46.8664	2761.9	2.4904	18.492	3.8355	0.212348	9.89079	0.0284793	9.11683	0.92175	181.024	16.2741	195.521	17.5924	374.259	86.3558	181.024	16.2741	NA
10IDMM42-GR6B	154.696	6713.04	7.58712	19.2929	3.2956	0.20464	5.84166	0.0286342	4.82328	0.825669	181.995	8.65536	189.045	10.0766	278.057	75.4711	181.995	8.65536	NA
10IDMM42-GR24A	266.288	12654.7	6.40929	19.8864	1.58632	0.199786	7.43183	0.0288152	7.26056	0.976954	183.128	13.1091	184.945	12.5663	208.19	36.8052	183.128	13.1091	NA
10IDMM42-GR5F	90.9241	7249.06	4.81195	19.4791	1.55034	0.205746	14.5473	0.029067	14.4644	0.994305	184.706	26.3378	189.977	25.2103	255.969	35.6447	184.706	26.3378	NA
10IDMM42-GR37C	341.472	32070.1	7.81647	19.9219	1.75014	0.204848	10.6742	0.0295978	10.5298	0.986467	188.031	19.5133	189.22	18.4294	204.061	40.6317	188.031	19.5133	NA
10IDMM42-GR24D	236.07	15775.6	6.32873	19.567	1.04142	0.210324	7.79136	0.0298479	7.72144	0.991027	189.596	14.4264	193.825	13.7486	245.635	23.9625	189.596	14.4264	NA
10IDMM42-GR9B	78.0096	7056.78	4.49112	19.4707	1.69298	0.212309	15.2417	0.0299812	15.1474	0.993812	190.431	28.4236	195.489	27.1096	256.985	38.9136	190.431	28.4236	NA
10IDMM42-GR31A	134.942	4485.51	2.29124	20.2539	1.82687	0.2073	4.69942	0.0304514	4.32979	0.921346	193.373	8.24832	191.285	8.19348	165.569	42.7186	193.373	8.24832	NA
10IDMM42-GR24C	65.3161	2355.19	2.4875	20.1465	3.98646	0.208652	6.90598	0.0304874	5.63921	0.81657	193.598	10.7551	192.421	12.1059	177.984	92.9575	193.598	10.7551	NA
10IDMM42-GR30A	101.8	9229.85	6.27656	20.1275	0.950182	0.209836	2.71069	0.0306315	2.5387	0.936551	194.5	4.86401	193.415	4.77383	180.183	22.1292	194.5	4.86401	NA
10IDMM42-GR24B	428.996	16409.5	6.11903	19.8168	1.15179	0.215035	2.77075	0.0309059	2.52	0.909503	196.216	4.87015	197.769	4.9791	216.323	26.6904	196.216	4.87015	NA
10IDMM42-GR33A	117.459	6952.61	2.44864	19.8521	2.91932	0.21467	10.1727	0.0309083	9.74479	0.957938	196.23	18.8342	197.464	18.2568	212.201	67.6777	196.23	18.8342	NA
10IDMM42-GR35A	96.1924	6519.25	5.85351	19.6082	3.8366	0.218528	5.74306	0.0310773	4.27355	0.744124	197.287	8.30346	200.684	10.4583	240.764	88.4488	197.287	8.30346	NA
10IDMM42-GR30C	175.232	9746.05	4.20627	19.8649	2.05115	0.217264	3.67101	0.0313021	3.04451	0.82934	198.693	5.95695	199.63	6.6531	210.737	47.551	198.693	5.95695	NA
10IDMM42-GR26A	90.3738	6047.12	3.23935	19.7187	1.98741	0.218954	10.5879	0.0313134	10.3997	0.982225	198.763	20.3555	201.039	19.3134	227.817	45.9237	198.763	20.3555	NA
10IDMM42-GR30A	4748.81	189396	15.899	19.6531	0.770414	0.224503	5.53606	0.0320001	5.48219	0.990269	203.054	10.9583	205.651	10.3064	235.534	17.7929	203.054	10.9583	NA
10IDMM42-GR14B	160.498	9437.32	5.24243	19.2058	1.86715	0.230495	4.32961	0.0321064	3.90631	0.902231	203.718	7.83345	210.607	8.23511	288.393	42.6749	203.718	7.83345	NA
10IDMM42-GR30D	861.615	26557.8	15.3494	19.8472	0.748848	0.223903	4.11899	0.0322297	4.05035	0.983335	204.488	8.1525	205.153	7.65141	212.771	17.3274	204.488	8.1525	NA
10IDMM42-GR36B	50.7692	3580.72	3.10577	19.2582	3.54166	0.232099	4.82141	0.0324182	3.27148	0.678533	205.665	6.62211	211.93	9.2224	282.167	81.0436	205.665	6.62211	NA
10IDMM42-GR37D	189.95	5263.43	48.7107	20.5028	1.08072	0.219866	1.88203	0.0326942	1.5408	0.818692	207.388	3.14459	201.799	3.44433	136.996	25.3982	207.388	3.14459	NA
10IDMM42-GR15I	51.2564	7128.64	2.96437	18.2894	1.21502	0.24963	2.51283	0.0331127	2.19956	0.87533	210	4.54465	226.276	5.09697	398.997	27.2297	210	4.54465	NA
10IDMM42-GR15K	31.2434	1518.85	4.98113	21.1083	4.73589	0.21745	5.36809	0.0332898	2.52741	0.47082	211.105	5.24907	199.785	9.7358	68.1368	112.727	211.105	5.24907	NA
10IDMM42-GR37B	488.083	46816.2	8.29644	19.7451	0.98553	0.233035	3.73162	0.0333718	3.59913	0.964495	211.617	7.4927	212.701	7.1611	224.707	22.8055	211.617	7.4927	NA
10IDMM42-GR30E	81.1984	3804.94	3.85939	20.3479	2.69451	0.227136	3.96779	0.03352	2.91256	0.73405	212.541	6.08945	207.831	7.45726	154.782	63.094	212.541	6.08945	NA
10IDMM42-32A	50.2939	6719.95	3.51282	19.293	4.78897	0.239875	6.24689	0.0335647	4.01115	0.642104	212.82	8.39717	218.318	12.2722	278.039	109.706	212.82	8.39717	NA
10IDMM42-GR15P	251.856	10329.3	2.85114	20.0213	1.1124	0.231711	2.74308	0.0336465	2.5074	0.914083	213.33	5.2615	211.611	5.23975	192.535	25.8806	213.33	5.2615	NA
10IDMM42-GR31B	100.822	6404.64	5.59495	19.8989	2.12542	0.234923	4.37664	0.0339041	3.82591	0.874166	214.937	8.0877	214.254	8.45407	206.763	49.3134	214.937	8.0877	NA
10IDMM42-GR15G	94.9289	4952.83	4.49602	19.893	3.20526	0.23508	3.86442	0.0339167	2.15871	0.558613	215.015	4.565	214.383	7.46864	207.457	74.3719	215.015	4.565	NA
10IDMM42-GR16D	212.918	9986.6	5.69612	20.0344	1.65979	0.235153	5.39312	0.0341684	5.13136	0.951464	216.584	10.9291	214.444	10.4259	191.026	38.5969	216.584	10.9291	NA
10IDMM42-GR39A	966.591	115697	10.3314	19.7749	0.690523	0.238876	3.4261	0.0342599	3.35579	0.979479	217.154	7.16587	217.499	6.70781	221.215	15.9758	217.154	7.16587	NA
10IDMM42-GR36G	219.539	18917.9	1.53946	19.8759	0.719341	0.241176	3.53697	0.0347664	3.46305	0.9791	220.31	7.50056	219.383	6.97861	209.443	16.6683	220.31	7.50056	NA
10IDMM42-GR36F	61.9152	3492.86	4.2395	19.941	3.32127	0.242041	5.45524	0.0350053	4.32768	0.793307	221.799	9.43551	220.091	10.7948	201.842	77.1432	221.799	9.43551	NA
10IDMM42-GR36H	49.8536	3422.68	3.64393	19.7784	4.00338	0.244677	6.94524	0.035098	5.67533	0.817153	222.376	12.4054	222.243	13.8638	220.843	92.6313	222.376	12.4054	NA
10IDMM42-GR38A	75.6732	16916.7	5.58909	18.8011	1.91354	0.259517	2.86796	0.0353873	2.13625	0.744868	224.178	4.70669	234.277	6.00025	336.845	43.3488	224.178	4.70669	NA
10IDMM42-GR36E	21.4532	1537.01	31.6113	20.609	7.94564	0.265711	15.6447	0.039716	13.4768	0.861428	251.072	33.1863	239.258	33.3602	124.795	187.318	251.072	33.1863	NA
10IDMM42-R33	77.6745	14580.9	2.09148	17.1257	4.95249	0.495411	10.7433	0.0615338	9.53369	0.887408	384.946	35.6257	408.591	36.154	544.48	108.294	384.946	35.6257	NA
10IDMM42-R33	51.2403	21301	2.05675	17.1976	2.00822	0.580002	11.4658	0.0723428	11.2885	0.984542	450.255	49.0936	464.463	42.7623	535.356	43.948	450.255	49.0936	NA
10IDMM42-GR15A	84.989	12270.5	687.24	20.8363	12.6047	0.144311	12.9046	0.0218082	2.76549	0.214303	139.074	3.80488	136.876	16.526	98.9049	299.214	139.074	3.80488	NA
10IDMM42-GR11B_CORE	77.3646	18466.6	4.17745	19.1046	14.3211	0.186286	15.8073	0.0258116	6.69143	0.423313	164.281	10.8539	173.455	25.2097	300.469	328.058	164.281	10.8539	NA
10IDMM42-GR18B	175.699	16123	2.41069	19.7759	7.52682	0.206247	7.97125	0.0295817	2.62447	0.329242	187.929	4.86096	190.398	13.8399	221.097	174.33	187.929	4.86096	NA
10IDMM42-16B	51.3548	41370.4	3.76165	24.4575	22.5012	0.168975	23.8248	0.0299733	7.83069	0.328677	190.381	14.6902	158.529	34.9824	-294.604	580.513	190.381	14.6902	NA
10IDMM42-GR10C_CORE	87.5501	36375.9	2.81268	18.7701	12.307	0.22082	13.3901	0.030061	5.2755	0.393986	190.93	9.9248	202.592	24.5971	340.602	279.607	190.93	9.9248	NA
10IDMM42-GR13A	65.427	11375.8	2.90951	21.8677	20.316	0.195676	20.8833	0.0310341	4.83448	0.2315	197.017	9.38069	181.461	34.7154	-16.6011	495.568	197.017	9.38069	NA
10IDMM42-GR12A	51.0737	26961.6	3.31805	20.1754	31.1127	0.213597	32.1208	0.0312547	7.98387	0.248558	198.396	15.5984	196.566	57.4645	174.639	741.773	198.396	15.5984	NA
10IDMM42-15E	50.4629	34150.6	6.87343	20.0931	25.7657	0.214538	26.1741	0.0312644	4.60544	0.175954	198.457	9.00057	197.354	46.9791	184.164	608.92	198.457	9.00057	NA
10IDMM42-GR17B_CORE	33.4837	7284.34	4.89798	21.6101	51.5558	0.201067	52.0051	0.0315135	6.82184	0.131176	200.014	13.4351	186.029	88.6239	11.9439	1321.73	200.014	13.4351	NA
10IDMM42-16C_CORE	70.0289	14872.4	2.44242	18.7798	17.9319	0.231501	18.7327	0.0315314	5.41859	0.289259	200.126	10.6774	211.437	35.7707	339.427	408.98	200.126	10.6774	NA
10IDMM42-GR15B	45.0321	9102.93	4.60513	23.6976	34.0489	0.183839	34.9002	0.0315966	7.66156	0.219528	200.533	15.1275	171.359	55.0844	-214.655	877.224	200.533	15.1275	NA
10IDMM42-GR6A	52.0962	7548.23	3.64473	19.5766	17.7273	0.222564	18.1375	0.0316003	3.83521	0.211452	200.556	7.57333	204.042	33.5389	244.51	411.152	200.556	7.57333	NA
10IDMM42-GR14A	69.091	13163.9	3.62527	21.7111	31.1549	0.200699	31.7523	0.0316027	6.13056	0.193074	200.572	12.1069	185.717	53.9417	0.727601	766.999	200.572	12.1069	NA
10IDMM42-GR15C	52.2221	10940.8	3.74608	20.0445	25.7614	0.217983	26.0477	0.0316895	3.85134	0.147857	201.113	7.62599	200.229	47.369	189.806	608.193	201.113	7.62599	NA
10IDMM42-16A	158.617	33784.6	5.4537	21.0294	7.92707	0.207848	8.37935	0.0317009	2.7157	0.324095	201.185	5.37921	191.746	14.6421	77.0444	188.548	201.185	5.37921	NA
10IDMM42-GR18A	56.7451	10115.8	3.55435	22.0948	27.1359	0.198085	27.3113	0.0317423	3.09023	0.113149	201.444	6.12882	183.504	45.8807	-41.6373	669.835	201.444	6.12882	NA
10IDMM42-GR15D	83.705	22898.9	2.52694	18.9332	17.2008	0.231488	17.3399	0.0317871	2.1921	0.126419	201.723	4.3535	211.426	33.1078	320.982	393.382	201.723	4.3535	NA
10IDMM42-GR10A	59.2303	14984.7	5.03171	21.6087	23.376	0.204288	23.5998	0.0320163	3.24265	0.137402	203.155	6.4849	188.748	40.6709	12.1219	568.789	203.155	6.4849	NA
10IDMM42-GR19A	68.5751	14461	3.43078	20.5056	17.9052	0.215431	18.1643	0.032039	3.05733	0.168315	203.297	6.11847	198.1	32.7022	136.631	423.594	203.297	6.11847	NA
10IDMM42-GR4A	70.1491	10406.4	2.56196	22.014	18.2818	0.201571	19.1785	0.0321829	5.79587	0.302206	204.196	11.6494	186.454	32.6793	-32.7431	446.556	204.196	11.6494	NA
10IDMM42-GR1C_CORE	33.471	7344.61	4.82727	20.4733	59.0938	0.216922	59.4362	0.0322099	6.37088	0.107189	204.365	12.8156	199.344	107.983	140.337	1517.88	204.365	12.8156	NA
10IDMM42-GR5B	75.0056	22461.7	4.51417	15.7253	15.1807	0.282639	15.297	0.0322352	1.88282	0.123084	204.522	3.79033	252.749	34.2395	728.099	323.535	204.522	3.79033	NA
10IDMM42-GR5C_CORE	59.3066	10854.1	2.33155	22.4746	36.1083	0.198309	36.5926	0.0323245	5.93364	0.162154	205.08	11.9772	183.694	61.5641	-83.2114	910.154	205.08	11.9772	NA
10IDMM42-GR3A	86.7601	26167.7	4.07784	20.972	17.3558	0.212692	17.7595	0.0323513	3.76509	0.212004	205.247	7.60602	195.81	31.6376	83.5224	414.461	205.247	7.60602	NA
10IDMM42-GR11A	220.132	42000.5	5.95705	19.4402	9.30427	0.229824	9.62655	0.0324036	2.47001	0.256583	205.574	4.99759	210.053	18.2684	260.613	214.091	205.574	4.99759	NA
10IDMM42-GR17A	173.715	50161.1	5.12828	18.675	6.37961	0.240682	6.56133	0.0325988	1.53351	0.233719	206.793	3.12087	218.979	12.9249	352.08	144.283	206.793	3.12087	NA
10IDMM42-GR5D	133.868	53286.8	4.47766	19.9603	10.0381	0.225438	10.9604	0.0326357	4.40072	0.401512	207.023	8.96578	206.426	20.4762	199.626	233.61	207.023	8.96578	NA
10IDMM42-GR1	76.2192	16113.1	5.2794	18.7689	16.2483	0.24002	16.4366	0.0326727	2.48054	0.150916	207.254	5.05925	218.437	32.3151	340.745	370.036	207.254	5.05925	NA
10IDMM42-GR18C_CORE	63.9098	18202.7	4.1061	19.6906	18.4744	0.229383	19.0668	0.0327581	4.71571	0.247326	207.787	9.64242	209.689	36.1381	231.093	429.794	207.787	9.64242	NA
10IDMM42-GR20C_CORE	47.026	10668.3	3.57953	23.037	38.8908	0.196525	39.0896	0.0328354	3.9372	0.100722	208.27	8.06896	182.181	65.2807	-144.11	996.617	208.27	8.06896	NA
10IDMM42-GR1B_RIM	89.173	57687.1	3.81228	19.6771	16.2451	0.230172	16.6727	0.0328483	3.75213	0.225046	208.35	7.69257	210.341	31.6858	232.673	377.154	208.35	7.69257	NA
10IDMM42-GR20B	62.1333	36373.5	3.22468	17.1962	22.8942	0.264342	23.8128	0.0329683	6.55047	0.275082	209.099	13.4772	238.16	50.5943	535.5	507.173	209.099	13.4772	NA
10IDMM42-GR5A	123.29	35489.7	2.80279	20.0373	13.696	0.227592	13.9751	0.0330746	2.77877	0.198838	209.762	5.735	208.209	26.3138	190.683	319.871	209.762	5.735	NA
10IDMM42-GR20A	65.0977	19322.2	2.75059	17.7624	16.6517	0.256815	16.9186	0.0330843	2.99317	0.176916	209.823	6.17926	232.097	35.1169	464.166	371.248	209.823	6.17926	NA
10IDMM42-GR9A	68.4066	18184.5	3.7949	19.1368	17.8678	0.239647	18.2627	0.0332614	3.77729	0.206831	210.928	7.83843	218.131	35.8632	296.596	410.624	210.928	7.83843	NA
10IDMM42-GR8A	49.9976	15412.2	3.63582	17.7223	30.7245	0.260032	31.8019	0.033423	8.20799	0.258097	211.936	17.1129	234.693	66.7349	469.168	695.248	211.936	17.1129	NA
10IDMM42-GR5E	55.9905	11174.4	3.46642	24.716	33.7594	0.186616	33.8584	0.0334522	2.58748	0.0764205	212.119	5.3992	173.738	54.1185	-321.517	887.857	212.119	5.3992	NA
10IDMM42-GR7A	66.4902	19893.6	2.91471	23.7435	29.0662	0.195099	30.4074	0.0335968	8.93121	0.293718	213.02	18.7145	180.971	50.445	-219.52	744.302	213.02	18.7145	NA
10IDMM42-GR2A	246.467	99968.5	5.86518	20.2922	6.32053	0.228818	7.0203	0.0336759	3.05542	0.435226	213.513	6.41687	209.223	13.2744	161.156	147.96	213.513	6.41687	NA
10IDMM42-GR21C	86.3465	1508.59	2.60752	15.5514	49.9883	0.296401	53.8366	0.033431	19.9888	0.371287	211.986	41.685	263.585	125.619	751.584	1126.8	211.986	41.685	NA
10IDMM42-GR22A	73.0302	2540.37	3.62647	14.4431	128.703	0.308131	129.126	0.0322771	10.433	0.0807974	204.784	21.0295	272.732	318.925	905.8	565.524	204.784	21.0295	22.6081
10IDMM42-GR25A	89.8222	2657.8	4.87636	13.3338	149.144	0.327354	149.263	0.0316569	5.95426	0.039891	200.91	11.7782	287.543	392.182	1068.45	574.229	200.91	11.7782	18.8038
10IDMM42-23A	75.5161	1343.05	3.86297	18.5783	55.4596	0.249639	56.9738	0.0336371	13.0475	0.229009	213.271	27.3715	226.283	116.07	363.761	1353.77	213.271	27.3715	NA
10IDMM42-23B	78.0802	1594.46	4.66545	13.6722	107.211	0.315779	107.717	0.0313126	10.4286	0.0968141	198.758	20.4114	278.65	268.586	1017.85	342.55	198.758	20.4114	19.5272
10IDMM42G1A	191.149	4228.05	5.80804	22.9065	39.8982	0.196507	41.27	0.0326463	10.5523	0.255688	207.09	21.5054	182.166	68.9276	-130.047	1021.64	207.09	21.5054	NA
10IDMM42G2	89.1381	2106.35	2.3057	18.0562	61.116	0.239999	62.1669	0.0314293	11.3826	0.183098	199.488	22.3593	218.42	122.769	427.682	1508.01	199.488	22.3593	NA
10IDMM42G5	152.856	3134.81	2.13814	22.9901	37.1213	0.197611	38.3112	0.0329496	9.47406	0.247292	208.983	19.4817	183.102	64.2732	-139.062	947.326	208.983	19.4817	NA
10IDMM42G6A	96.8221	3632.13	4.59277	22.2766	55.2787	0.195644	56.1204	0.0316092	9.68291	0.172538	200.612	19.126	181.434	93.5063	-61.5874	1452.61	200.612	19.126	NA
10IDMM42G6B	116.057	2212.64	7.37148	24.1076	55.3876	0.187904	56.9061	0.0328541	13.0584	0.229472	208.386	26.7769	174.839	91.6476	-257.946	1510.3	208.386	26.7769	NA
Standards
R33-Standard	77.6745	14580.9	2.09148	17.1257	4.95249	0.495411	10.7433	0.0615338	9.53369	0.887408	384.946	35.6257	408.591	36.154	544.48	108.294	384.946	35.6257	NA
R33-Standard	51.2403	21301	2.05675	17.1976	2.00822	0.580002	11.4658	0.0723428	11.2885	0.984542	450.255	49.0936	464.463	42.7623	535.356	43.948	450.255	49.0936	NA
SL-Standard											562.281	33.1524	563.363	26.9533
R33-Standard											450.255	49.0936	464.463	42.7623
SL-Standard											567.007	25.5281	566.994	20.5515
SL-Standard											563.82	49.5321	565.936	39.8989
SL-Standard											538.041	60.1585	541.746	49.0319
SL-Standard											546.032	59.6812	546.222	48.2754
SL-Standard											566.254	42.0082	565.404	33.7515
SL-Standard											580.959	33.7513	577.78	26.9013
SL-Standard											552.967	39.0016	553.837	31.6679
SL-Standard											554.868	43.0653	555.571	34.994
SL-Standard											559.469	25.6475	558.707	20.7219
SL-Standard											573.885	26.7153	570.818	21.4757
SL-Standard											570.959	16.7798	570.976	13.7621
SL-Standard											563.34	17.1645	563.101	14.0501
SL-Standard											563.77	31.9795	563.833	25.8403
SL-Standard											562.674	14.3335	563.219	12.126
SL-Standard											563.744	20.9225	566.331	17.7508
SL-Standard											563.129	19.2906	564.098	15.799
SL-Standard											563.253	18.8671	562.282	15.4989
SL-Standard											553.107	34.3974	554.779	28.2108

## Sheet: PlotDat4
Source sheet	Table 7-PRC01	0.0965152	0.0145087	70		80		90		100		110		120		0.0652102	0.01	0.065327	0.01	0.0608718	0.00935095	0.0668797	0.01	0.109266	0.0162293	0.12111	0.0177525	0.0996458	0.0147012	0.106379	0.0147422	0.10936	0.0145181	0.105783	0.0143171	0.132014	0.0173914	0.114918	0.016813	0.0953501	0.0142828	0.108262	0.013765	0.100175	0.013963	0.0953478	0.0144513	0.105078	0.0145621
Plot name	Concordia4	0.110763	0.0169795	0.0714943	0.0109179	0.0821168	0.0124873	0.0928446	0.0140592	0.103679	0.0156334	0.11462	0.0172102	0.12567	0.0187893	0.0652102	0.01	0.0675102	0.0103252	0.0713714	0.0109179	0.131125	0.02	0.109006	0.0163084	0.1209	0.0178915	0.0994136	0.01486	0.106075	0.0148162	0.108928	0.0145815	0.105576	0.0143786	0.131825	0.0174497	0.114819	0.0168602	0.0951858	0.0143525	0.107985	0.0138319	0.100015	0.0140105	0.0952301	0.0145295	0.104892	0.0146757
Plot Type	1	0.088191	0.0139082	0.071492	0.0109207	0.0821141	0.0124905	0.0928415	0.0140628	0.103675	0.0156375	0.114616	0.0172146	0.125666	0.0187942	0.0675102	0.0103432	0.0698152	0.0106679	0.0819749	0.0124873			0.108266	0.0163184	0.1203	0.0179954	0.0987502	0.0149821	0.105174	0.0148851	0.107649	0.0146414	0.104966	0.0144352	0.131266	0.017503	0.114527	0.016902	0.0947011	0.0144155	0.107165	0.0138939	0.0995423	0.0140542	0.0948954	0.0145868	0.104351	0.0147704
1st free col	81	0.0905532	0.0146829	0.071485	0.0109234	0.082106	0.0124936	0.0928323	0.0140663	0.103665	0.0156413	0.114605	0.0172189	0.125653	0.0187988	0.0698152	0.0106865	0.0721252	0.0110107	0.0926834	0.0140592			0.107074	0.0162589	0.119334	0.0180602	0.097681	0.015063	0.103711	0.0149463	0.105571	0.0146954	0.103976	0.0144846	0.130359	0.0175493	0.114054	0.0169369	0.0939144	0.0144693	0.105834	0.0139487	0.098775	0.0140924	0.0943567	0.0146211	0.103475	0.0148426
Sigma Level	2	0.0868828	0.0144892	0.0714736	0.0109259	0.0820929	0.0124965	0.0928174	0.0140695	0.103648	0.0156449	0.114586	0.0172228	0.125633	0.0188031	0.0721252	0.0110299	0.0744401	0.0113537	0.103498	0.0156334			0.105477	0.0161321	0.118038	0.0180835	0.0962471	0.0150994	0.101743	0.0149973	0.102776	0.0147415	0.102643	0.014525	0.129138	0.0175868	0.113418	0.0169635	0.0928562	0.0145119	0.104042	0.0139942	0.0977425	0.0141237	0.0936346	0.014631	0.102298	0.0148894
Absolute Errs	FALSE	0.0950689	0.0142496	0.0714583	0.0109281	0.0820753	0.012499	0.0927974	0.0140723	0.103626	0.015648	0.114561	0.0172262	0.125605	0.0188069	0.0744401	0.0113735	0.0767601	0.0116967	0.114419	0.0172102			0.103535	0.0159429	0.116463	0.0180644	0.0945036	0.0150902	0.0993444	0.0150363	0.0993699	0.0147779	0.101019	0.0145548	0.127651	0.0176141	0.112643	0.0169808	0.091567	0.0145417	0.101859	0.0140285	0.0964845	0.0141469	0.092757	0.0146161	0.100865	0.0149091
Symbol Type	1	0.1222	0.0173206	0.0714397	0.0109299	0.0820537	0.012501	0.092773	0.0140746	0.103598	0.0156506	0.114531	0.0172291	0.125572	0.01881	0.0767601	0.0117171	0.0790851	0.0120399	0.125449	0.0187893			0.101323	0.0156986	0.114668	0.0180036	0.0925175	0.0150354	0.0966082	0.0150616	0.0954839	0.0148032	0.0991669	0.0145729	0.125954	0.0176301	0.111759	0.0169881	0.0900965	0.0145574	0.0993678	0.0140505	0.0950493	0.014161	0.0917574	0.014577	0.0992316	0.014901
Inverse Plot	FALSE	0.109807	0.0167209	0.0714184	0.0109312	0.0820292	0.0125025	0.0927451	0.0140763	0.103567	0.0156525	0.114496	0.0172312	0.125534	0.0188123	0.0790851	0.0120609	0.081415	0.0123832	IsoLine	IsoLine			0.0989266	0.0154086	0.112724	0.0179034	0.0903652	0.0149374	0.0936393	0.0150724	0.0912674	0.0148164	0.097157	0.0145786	0.124112	0.0176342	0.1108	0.0169851	0.088501	0.0145585	0.0966652	0.0140591	0.0934922	0.0141655	0.0906744	0.0145152	0.0974604	0.0148653
Color Plot	TRUE	0.0868465	0.014177	0.0713954	0.010932	0.0820026	0.0125035	0.0927148	0.0140773	0.103533	0.0156537	0.114459	0.0172325	0.125492	0.0188137	0.081415	0.0124048	0.08375	0.0127266					0.0964375	0.015084	0.110704	0.0177678	0.0881292	0.0147998	0.0905518	0.0150683	0.0868824	0.0148171	0.0950668	0.0145716	0.122197	0.0176263	0.109803	0.0169719	0.0868419	0.0145449	0.0938546	0.0140542	0.0918728	0.0141603	0.0895496	0.014433	0.0956194	0.0148034
3D plot	FALSE	0.0938561	0.0137054	0.0713714	0.0109323	0.0819749	0.0125038	0.0926834	0.0140777	0.103498	0.0156541	0.114419	0.0172329	0.125449	0.0188142	0.08375	0.0127488	0.0860901	0.0130701					0.0939514	0.0147373	0.108687	0.0176018	0.0858957	0.014628	0.0874643	0.0150493	0.0824974	0.0148051	0.0929767	0.0145523	0.120283	0.0176066	0.108806	0.0169491	0.085183	0.0145172	0.0910441	0.0140359	0.0902535	0.0141455	0.0884262	0.0143337	0.0937794	0.0147177
Linear	FALSE	0.0918744	0.0139116	0.0713474	0.010932	0.0819472	0.0125035	0.0926519	0.0140773	0.103463	0.0156537	0.11438	0.0172325	0.125406	0.0188137	0.0860901	0.0130929	0.0884352	0.0134137					0.0915638	0.0143818	0.106749	0.0174119	0.0837504	0.0144285	0.0844956	0.0150163	0.0782809	0.014781	0.0909671	0.0145213	0.118442	0.0175759	0.107848	0.0169176	0.0835881	0.0144764	0.0883417	0.0140049	0.0886965	0.0141217	0.0873473	0.0142211	0.0920111	0.0146114
Data Range	G6:K33	0.0895857	0.0139863	0.0713243	0.0109312	0.0819206	0.0125025	0.0926217	0.0140763	0.103429	0.0156525	0.114342	0.0172312	0.125364	0.0188123	0.0884352	0.0134372	0.0907854	0.0137575					0.0893665	0.0140312	0.104966	0.0172054	0.0817757	0.014209	0.0817596	0.0149704	0.074395	0.0147457	0.089115	0.0144799	0.116745	0.0175354	0.106965	0.0168784	0.0821183	0.0144242	0.0858512	0.0139623	0.0872617	0.0140898	0.0863544	0.0140994	0.0903823	0.0144888
Filled Symbols	TRUE	0.0956443	0.0141838	0.0713031	0.0109299	0.0818961	0.012501	0.0925938	0.0140746	0.103397	0.0156506	0.114308	0.0172291	0.125326	0.01881	0.0907854	0.0137815	0.0931406	0.0141014					0.0874439	0.0136989	0.103405	0.0169902	0.0800475	0.0139779	0.0793616	0.0149135	0.070989	0.0147006	0.0874917	0.0144296	0.115258	0.0174866	0.106191	0.0168333	0.0808303	0.0143624	0.0836683	0.0139099	0.0860041	0.0140511	0.0854857	0.0139734	0.0889558	0.0143544
ConcAge	FALSE	0.0945061	0.0142246	0.0712845	0.0109281	0.0818746	0.012499	0.0925694	0.0140723	0.10337	0.015648	0.114277	0.0172262	0.125292	0.0188069	0.0931406	0.014126	0.0955009	0.0144454					0.08587	0.0133977	0.102127	0.0167746	0.0786323	0.0137442	0.0773937	0.0148477	0.0681938	0.0146473	0.0861597	0.0143724	0.114038	0.0174315	0.105556	0.0167838	0.0797735	0.0142935	0.0818769	0.0138497	0.084972	0.0140071	0.0847745	0.0138479	0.0877863	0.0142134
ConcSwap	FALSE	0.100156	0.0147512	0.0712692	0.0109259	0.0818569	0.0124965	0.0925494	0.0140695	0.103347	0.0156449	0.114252	0.0172228	0.125265	0.0188031	0.0955009	0.0144706	0.0978664	0.0147895					0.0847051	0.0131393	0.101181	0.0165669	0.0775845	0.0135167	0.0759315	0.0147756	0.0661167	0.0145879	0.08517	0.0143105	0.113131	0.0173721	0.105085	0.0167318	0.0789884	0.0142201	0.0805458	0.0137839	0.0842053	0.0139593	0.0842483	0.0137277	0.0869188	0.0140714
1st Symbol-row	1	0.102837	0.0140643	0.0712578	0.0109234	0.0818438	0.0124936	0.0925345	0.0140663	0.103331	0.0156413	0.114234	0.0172189	0.125244	0.0187988	0.0978664	0.0148153	0.100237	0.0151337					0.083994	0.0129334	0.100604	0.016375	0.0769442	0.0133043	0.0750312	0.0146999	0.0648378	0.0145248	0.0845607	0.0142462	0.112573	0.0173107	0.104795	0.0166795	0.0785054	0.0141451	0.0797263	0.013715	0.0837332	0.0139098	0.0839272	0.0136174	0.0863866	0.0139336
		0.0914101	0.0140801	0.0712508	0.0109207	0.0818358	0.0124905	0.0925253	0.0140628	0.10332	0.0156375	0.114222	0.0172146	0.125232	0.0187942	0.100237	0.0151601	0.102613	0.015478					0.0837641	0.0127882	0.100416	0.0162064	0.0767361	0.0131151	0.0747274	0.0146236	0.064406	0.0144603	0.0843552	0.0141821	0.112385	0.0172497	0.104697	0.0166288	0.0783429	0.0140713	0.0794498	0.0136458	0.083574	0.0138603	0.0838235	0.0135213	0.0862102	0.0138055
		0.0818146	0.0145198	0.0712485	0.0109179	0.081833	0.0124873	0.0925222	0.0140592	0.103317	0.0156334	0.114218	0.0172102	0.125228	0.0187893	0.102613	0.0155051	0.104993	0.0158225					0.0840243	0.012709	0.100627	0.0160674	0.0769683	0.0129564	0.0750317	0.0145495	0.0648379	0.0143968	0.0845615	0.0141206	0.112574	0.0171914	0.104796	0.0165816	0.0785072	0.0140016	0.0797269	0.0135789	0.0837338	0.0138127	0.0839412	0.0134431	0.0863963	0.0136919
		0.093669	0.0141881	0.0712508	0.0109151	0.0818358	0.0124841	0.0925253	0.0140555	0.10332	0.0156294	0.114222	0.0172057	0.125232	0.0187845	0.104993	0.0158501	0.107379	0.016167					0.0847645	0.012699	0.101227	0.0159636	0.0776317	0.0128343	0.0759326	0.0144806	0.0661171	0.014337	0.0851715	0.014064	0.113133	0.0171381	0.105088	0.0165397	0.0789919	0.0139386	0.0805469	0.0135169	0.0842065	0.013769	0.0842759	0.0133858	0.0869378	0.0135972
		0.0977388	0.0145934	0.0712578	0.0109124	0.0818438	0.012481	0.0925345	0.0140521	0.103331	0.0156255	0.114234	0.0172015	0.125244	0.0187798	0.107379	0.0161953	0.10977	0.0165117					0.0859562	0.0127585	0.102193	0.0158987	0.0787009	0.0127534	0.0773953	0.0144195	0.0681942	0.014283	0.0861619	0.0140146	0.11404	0.0170918	0.105561	0.0165048	0.0797785	0.0138848	0.0818785	0.0134621	0.0849738	0.0137308	0.0848146	0.0133515	0.0878139	0.013525
		0.0902412	0.0137918	0.0712692	0.0109099	0.0818569	0.0124782	0.0925494	0.0140489	0.103347	0.015622	0.114252	0.0171975	0.125265	0.0187755	0.10977	0.0165406	0.112167	0.0168565					0.0875537	0.0128853	0.103489	0.0158754	0.0801348	0.0127169	0.0793637	0.0143684	0.0709896	0.0142369	0.0874946	0.0139741	0.115261	0.0170543	0.106197	0.0164782	0.0808368	0.0138422	0.0836703	0.0134166	0.0860062	0.0136995	0.0855367	0.0133416	0.0889909	0.0134782
		0.0916459	0.0136881	0.0712845	0.0109078	0.0818746	0.0124757	0.0925694	0.0140461	0.10337	0.0156189	0.114277	0.0171941	0.125292	0.0187718	0.112167	0.016886	0.114568	0.0172015					0.0894956	0.0130745	0.105064	0.0158945	0.0818783	0.0127262	0.081762	0.0143295	0.0743957	0.0142005	0.0891184	0.0139443	0.116749	0.017027	0.106972	0.016461	0.0821259	0.0138124	0.0858536	0.0133822	0.0872642	0.0136763	0.0864143	0.0133565	0.0904236	0.0134584
		0.0945318	0.0143888	0.0713031	0.010906	0.0818961	0.0124736	0.0925938	0.0140437	0.103397	0.0156163	0.114308	0.0171913	0.125326	0.0187687	0.114568	0.0172315	0.116975	0.0175465					0.0917073	0.0133188	0.106858	0.0159553	0.0838644	0.0127809	0.0844983	0.0143041	0.0782817	0.0141752	0.0909708	0.0139262	0.118446	0.017011	0.107856	0.0164537	0.0835965	0.0137967	0.0883444	0.0133603	0.0886994	0.0136622	0.0874139	0.0133956	0.092057	0.0134666
		0.0772951	0.0131745	0.0713243	0.0109046	0.0819206	0.0124721	0.0926217	0.014042	0.103429	0.0156144	0.114342	0.0171892	0.125364	0.0187664	0.116975	0.0175772	0.119386	0.0178917					0.0941037	0.0136088	0.108802	0.0160555	0.0860168	0.012879	0.0874672	0.0142933	0.0824982	0.0141619	0.0929807	0.0139206	0.120287	0.0170069	0.108815	0.0164567	0.085192	0.0137956	0.091047	0.0133516	0.0902566	0.0136577	0.0884969	0.0134574	0.0938282	0.0135023
		0.0777181	0.0139539	0.0713474	0.0109038	0.0819472	0.0124712	0.0926519	0.014041	0.103463	0.0156132	0.11438	0.0171879	0.125406	0.018765	0.119386	0.0179229	0.121803	0.0182369					0.0965928	0.0139334	0.110822	0.0161912	0.0882527	0.0130166	0.0905546	0.0142975	0.0868832	0.0141613	0.0950709	0.0139275	0.122202	0.0170149	0.109812	0.0164698	0.0868511	0.0138092	0.0938575	0.0133565	0.0918759	0.013663	0.0896217	0.0135396	0.0956691	0.0135642
		0.0618158	0.0138541	0.0713714	0.0109035	0.0819749	0.0124709	0.0926834	0.0140406	0.103498	0.0156128	0.114419	0.0171874	0.125449	0.0187645	0.121803	0.0182688	0.124226	0.0185823					0.0990789	0.0142801	0.11284	0.0163571	0.0904862	0.0131884	0.0936421	0.0143165	0.0912682	0.0141732	0.097161	0.0139469	0.124117	0.0170345	0.110809	0.0164926	0.0885099	0.0138369	0.096668	0.0133749	0.0934952	0.0136777	0.0907452	0.0136389	0.0975092	0.0136499
		0.0861048	0.0126185	0.0713954	0.0109038	0.0820026	0.0124712	0.0927148	0.014041	0.103533	0.0156132	0.114459	0.0171879	0.125492	0.018765	0.124226	0.0186148	0.126653	0.0189278					0.101466	0.0146356	0.114777	0.016547	0.0926316	0.0133879	0.0966108	0.0143495	0.0954847	0.0141973	0.0991707	0.0139779	0.125958	0.0170652	0.111767	0.0165242	0.0901049	0.0138776	0.0993705	0.0134059	0.0950522	0.0137015	0.0918241	0.0137515	0.0992775	0.0137561
		0.0860883	0.0135442	0.0714184	0.0109046	0.0820292	0.0124721	0.0927451	0.014042	0.103567	0.0156144	0.114496	0.0171892	0.125534	0.0187664	0.126653	0.0189609	0.129086	0.0192734					0.103664	0.0149863	0.116561	0.0167535	0.0946063	0.0136074	0.0993468	0.0143954	0.0993706	0.0142326	0.101023	0.0140193	0.127654	0.0171057	0.11265	0.0165633	0.0915746	0.0139299	0.101861	0.0134484	0.0964871	0.0137334	0.0928169	0.0138732	0.100906	0.0138788
		IsoLine	IsoLine	0.0714397	0.010906	0.0820537	0.0124736	0.092773	0.0140437	0.103598	0.0156163	0.114531	0.0171913	0.125572	0.0187687	0.129086	0.0193072	0.131524	0.0196192					0.105586	0.0153185	0.118121	0.0169687	0.0963344	0.0138385	0.101745	0.0144523	0.102777	0.0142778	0.102646	0.0140696	0.129141	0.0171545	0.113424	0.0166085	0.0928627	0.0139917	0.104044	0.0135008	0.0977447	0.0137721	0.0936856	0.0139992	0.102333	0.0140132
				0.0714583	0.0109078	0.0820753	0.0124757	0.0927974	0.0140461	0.103626	0.0156189	0.114561	0.0171941	0.125605	0.0187718	0.131524	0.0196535	0.133967	0.019965					0.10716	0.0156197	0.119399	0.0171843	0.0977496	0.0140722	0.103713	0.0145181	0.105572	0.014331	0.103978	0.0141268	0.130362	0.0172096	0.114059	0.016658	0.0939195	0.0140606	0.105835	0.0135611	0.0987767	0.0138162	0.0943968	0.0141247	0.103502	0.0141541
				0.0714736	0.0109099	0.0820929	0.0124782	0.0928174	0.0140489	0.103648	0.015622	0.114586	0.0171975	0.125633	0.0187755	0.133967	0.02	0.134214	0.02					0.108325	0.0158781	0.120345	0.017392	0.0987975	0.0142997	0.105175	0.0145902	0.107649	0.0143904	0.104968	0.0141887	0.131268	0.017269	0.11453	0.0167099	0.0947046	0.014134	0.107166	0.0136269	0.0995434	0.0138639	0.094923	0.0142449	0.10437	0.0142962
				0.071485	0.0109124	0.082106	0.012481	0.0928323	0.0140521	0.103665	0.0156255	0.114605	0.0172015	0.125653	0.0187798	0.133967	0.02	0.133721	0.02					0.109036	0.016084	0.120923	0.0175839	0.0994377	0.014512	0.106075	0.0146658	0.108928	0.0144536	0.105577	0.0142529	0.131826	0.0173304	0.11482	0.0167622	0.0951876	0.014209	0.107986	0.0136958	0.100015	0.0139135	0.0952442	0.0143552	0.104902	0.014434
				0.071492	0.0109151	0.0821141	0.0124841	0.0928415	0.0140555	0.103675	0.0156294	0.114616	0.0172057	0.125666	0.0187845	IsoLine	IsoLine	0.131524	0.0196879					0.109266	0.0162293	0.12111	0.0177525	0.0996458	0.0147012	0.106379	0.0147422	0.10936	0.0145181	0.105783	0.0143171	0.132014	0.0173914	0.114918	0.016813	0.0953501	0.0142828	0.108262	0.013765	0.100175	0.013963	0.0953478	0.0144513	0.105078	0.0145621
				0.0714943	0.0109179	0.0821168	0.0124873	0.0928446	0.0140592	0.103679	0.0156334	0.11462	0.0172102	0.12567	0.0187893			0.129086	0.0193409					ErrEll	ErrEll	ErrEll	ErrEll	ErrEll	ErrEll	ErrEll	ErrEll	ErrEll	ErrEll	ErrEll	ErrEll	ErrEll	ErrEll	ErrEll	ErrEll	ErrEll	ErrEll	ErrEll	ErrEll	ErrEll	ErrEll	ErrEll	ErrEll	ErrEll	ErrEll
				ConcTikEll	ConcTikEll	ConcTikEll	ConcTikEll	ConcTikEll	ConcTikEll	ConcTikEll	ConcTikEll	ConcTikEll	ConcTikEll	ConcTikEll	ConcTikEll			0.126653	0.0189941
																		0.124226	0.0186473
																		0.121803	0.0183007
																		0.119386	0.0179542
																		0.116975	0.0176079
																		0.114568	0.0172616
																		0.112167	0.0169155
																		0.10977	0.0165694
																		0.107379	0.0162235
																		0.104993	0.0158778
																		0.102613	0.0155321
																		0.100237	0.0151865
																		0.0978664	0.0148411
																		0.0955009	0.0144958
																		0.0931406	0.0141506
																		0.0907854	0.0138055
																		0.0884352	0.0134606
																		0.0860901	0.0131157
																		0.08375	0.012771
																		0.081415	0.0124264
																		0.0790851	0.0120819
																		0.0767601	0.0117375
																		0.0744401	0.0113933
																		0.0721252	0.0110491
																		0.0698152	0.0107051
																		0.0675102	0.0103612
																		0.0652102	0.0100174
																		0.0650941	0.01
																		0.065327	0.01
																		ConcBand	ConcBand
[truncated: 32 more columns]

## Sheet: Table DR7-PRC01
Table DR7. U-Pb for sample PRC01
							Isotope ratios						Apparent ages (Ma)
Analysis	U	206Pb	U/Th	206Pb*	±	207Pb*	±	206Pb*	±	error	206Pb*	±	207Pb*	±	206Pb*	±	Best age	±	Conc
	(ppm)	204Pb		207Pb*	(%)	235U*	(%)	238U	(%)	corr.	238U*	(Ma)	235U	(Ma)	207Pb*	(Ma)	(Ma)	(Ma)	(%)
PRC01-GR3A	858.064	15473.5	1.72796	20.7269	3.48539	0.0965152	10.795	0.0145087	10.2168	0.946443	92.8571	9.41904	93.5545	9.64816	111.396	82.3152	92.8571	9.41904	NA
PRC01-GR3B	191.904	9557.45	1.45276	21.1363	5.47986	0.110763	7.63276	0.0169795	5.31321	0.696105	108.538	5.71856	106.663	7.72848	65.0128	130.56	108.538	5.71856	NA
PRC01-GR3C	789.131	14277.1	2.57824	21.7444	7.96798	0.088191	10.6129	0.0139082	7.01035	0.66055	89.0402	6.19912	85.8168	8.73361	-2.94634	192.427	89.0402	6.19912	NA
PRC01-GR4A	272.109	1571.14	1.92594	22.3567	14.1141	0.0905532	14.2799	0.0146829	2.16989	0.151954	93.9638	2.02412	88.0186	12.0402	-70.3561	346.24	93.9638	2.02412	NA
PRC01-GR4C	253.664	7898.35	2.69443	22.9938	21.0564	0.0868828	21.138	0.0144892	1.85625	0.0878154	92.733	1.70903	84.5954	17.1588	-139.458	526.216	92.733	1.70903	NA
PRC01-GR5A	433.966	7691.1	2.91772	20.6664	9.01259	0.0950689	9.20796	0.0142496	1.88671	0.2049	91.2104	1.70876	92.2143	8.11707	118.253	212.831	91.2104	1.70876	NA
PRC01-GR5B	669.595	4955.92	3.48961	19.5431	6.39345	0.1222	6.56261	0.0173206	1.48041	0.225583	110.7	1.62482	117.064	7.25627	248.469	147.301	110.7	1.62482	NA
PRC01-GR5C	722.962	36530.8	3.59009	20.9956	3.57092	0.109807	3.8025	0.0167209	1.30671	0.343645	106.898	1.38533	105.789	3.82019	80.8589	84.7717	106.898	1.38533	NA
PRC01-GR5D	296.046	13482.7	2.88613	22.5079	7.69031	0.0868465	8.00046	0.014177	2.206	0.275734	90.7493	1.9879	84.5615	6.49134	-86.8428	188.688	90.7493	1.9879	NA
PRC01-GR5E	381.13	14711.9	3.377	20.134	12.3629	0.0938561	12.5416	0.0137054	2.10979	0.168223	87.7506	1.83881	91.0891	10.927	179.426	289.108	87.7506	1.83881	NA
PRC01-GR6A	458.656	16776.4	2.81994	20.8778	7.22963	0.0918744	7.38183	0.0139116	1.49126	0.202018	89.062	1.31902	89.2479	6.30698	94.2377	171.368	89.062	1.31902	NA
PRC01-GR6B	835.65	20062.7	2.35838	21.5261	3.66487	0.0895857	5.25558	0.0139863	3.76695	0.716752	89.5368	3.34949	87.1173	4.38764	21.2887	87.9965	89.5368	3.34949	NA
PRC01-GR6C	379.434	5478.86	3.03144	20.4472	6.88958	0.0956443	8.05946	0.0141838	4.18193	0.518885	90.7922	3.77025	92.7477	7.14385	143.331	161.809	90.7922	3.77025	NA
PRC01-GR7A	406.892	13132.7	2.51661	20.753	8.11632	0.0945061	8.30344	0.0142246	1.75285	0.2111	91.0516	1.58478	91.6923	7.28009	108.403	191.959	91.0516	1.58478	NA
PRC01-GR8A	597.562	25945.4	1.67439	20.3073	4.47009	0.100156	7.65127	0.0147512	6.20968	0.811589	94.398	5.81911	96.9202	7.07282	159.407	104.613	94.398	5.81911	NA
PRC01-GR8B	312.326	14499.4	3.95422	18.8569	9.46765	0.102837	9.56031	0.0140643	1.3278	0.138887	90.0327	1.18714	99.3915	9.05212	330.097	215.168	90.0327	1.18714	NA
PRC01-GR7B	663.937	27502	2.1631	21.238	5.5486	0.0914101	5.88449	0.0140801	1.95966	0.333021	90.1332	1.75401	88.8161	5.00436	53.5864	132.461	90.1332	1.75401	NA
PRC01-GR8C	126.508	2381.36	8.66124	24.4698	26.5975	0.0818146	27.0159	0.0145198	4.73606	0.175307	92.9274	4.36953	79.8495	20.7485	-295.885	689.333	92.9274	4.36953	NA
PRC01-GR1D	366.939	13202	2.73872	20.8848	10.0084	0.093669	10.2197	0.0141881	2.06724	0.20228	90.8197	1.8643	90.9154	8.88766	93.4072	237.524	90.8197	1.8643	NA
PRC01-GR2C	754.538	10005.8	3.29841	20.5869	6.01123	0.0977388	6.17318	0.0145934	1.40475	0.227556	93.3953	1.30251	94.6869	5.58099	127.37	141.56	93.3953	1.30251	NA
PRC01-GR2D	1272.19	68707.5	3.464	21.0725	3.13852	0.0902412	4.36579	0.0137918	3.03478	0.695126	88.3001	2.66144	87.7281	3.66925	72.1996	74.6437	88.3001	2.66144	NA
PRC01-GR2E	470.713	18293.4	2.3587	20.5936	5.33395	0.0916459	5.53751	0.0136881	1.48762	0.268644	87.6407	1.29494	89.0354	4.7204	126.61	125.643	87.6407	1.29494	NA
PRC01-GR1E	300.979	8195.13	2.80443	20.9869	10.2347	0.0945318	10.6899	0.0143888	3.08632	0.288712	92.0954	2.82215	91.7162	9.3749	81.8389	243.447	92.0954	2.82215	NA
PRC01--1A	580.179	3647.24	2.57076	23.5009	19.8222	0.0772951	24.0593	0.0131745	13.6356	0.56675	84.3738	11.4299	75.5987	17.5296	-193.753	500.104	84.3738	11.4299	NA
PRC01--1B	536.745	6865.27	2.66553	24.7557	38.6911	0.0777181	39.0475	0.0139539	5.26391	0.134808	89.331	4.66988	75.9973	28.5993	-325.644	1026.74	89.331	4.66988	NA
PRC01--1C	284.252	2473.63	2.83166	30.9017	51.7151	0.0618158	51.9925	0.0138541	5.36364	0.103162	88.6966	4.72478	60.9031	30.7435	-932.038	1600.42	88.6966	4.72478	NA
PRC01--G2A	2310.59	7537.08	2.75321	20.2061	3.151	0.0861048	6.64052	0.0126185	5.84532	0.88025	80.8354	4.69558	83.8683	5.34554	171.084	73.5667	80.8354	4.69558	NA
PRC01--G2B	374.927	7477.8	2.28275	21.6925	41.0693	0.0860883	42.1143	0.0135442	9.32343	0.221384	86.7254	8.03163	83.8529	33.9078	2.79728	1028.1	86.7254	8.03163	NA
Standards
R33-Standard	147.874	18491.9	1.51953	18.7114	3.82719	0.494725	4.01366	0.0671381	1.20916	0.301261	418.891	4.90399	408.125	13.4896	347.686	86.5609	418.891	4.90399	NA
SL-Standard											561.558	21.7934	564.323	18.2652
SL-Standard											566.764	4.89599	566.278	5.51084
SL-Standard											565.876	5.16183	563.923	5.91736
SL-Standard											563.029	4.84918	560.821	6.20031
SL-Standard											565.172	4.2924	564.735	5.62568
SL-Standard											566.849	5.51678	569.067	6.3635
SL-Standard											559.973	3.85531	560.01	3.98402
SL-Standard											566.727	5.38319	565.189	7.26465
SL-Standard											564.165	5.49087	564.679	5.79282
SL-Standard											565.964	6.84866	566.893	6.33996
SL-Standard											566.491	2.9211	567.971	4.8595
SL-Standard											567.955	3.20817	569.27	4.31086
SL-Standard											557.444	5.15317	557.877	5.50497
SL-Standard											568.37	6.56083	564.437	6.70642
SL-Standard											557.199	3.59299	555.345	6.61074
SL-Standard											558.431	2.88984	559.862	4.70616

[truncated: 3 more sheets: PlotDat6, Table DR8-ID04, Table DR9-ID58]
